# Supplementary material for: A 2D-DIGE-based proteomic analysis reveals differences in the platelet releasate composition when comparing thrombin and collagen stimulations
Source: PubMed Central journal article supplement (PMC4316189; doi:10.1038/srep08198), 2015-02-03
Supplement: srep08198-s1.pdf [file srep08198-s1.pdf]

# **A 2D-DIGE-based proteomic analysis reveals differences in the platelet releasate composition when comparing thrombin and collagen stimulations**

Paula Vélez<sup>1,2,3</sup>, Irene Izquierdo<sup>1,2,3</sup>, Isaac Rosa<sup>1,2,3</sup> and Ángel García\*<sup>1,2,3</sup>

<sup>1</sup>Center for Research in Molecular Medicine and Chronic Diseases (CIMUS), Universidade de Santiago de Compostela, Santiago de Compostela, Spain;

<sup>2</sup>Instituto de Investigación Sanitaria (IDIS), Santiago de Compostela, Spain;

<sup>3</sup>Department of Pharmacology, Faculty of Pharmacy, Universidade de Santiago de Compostela, Santiago de Compostela, Spain.

## Supplementary Figure 1

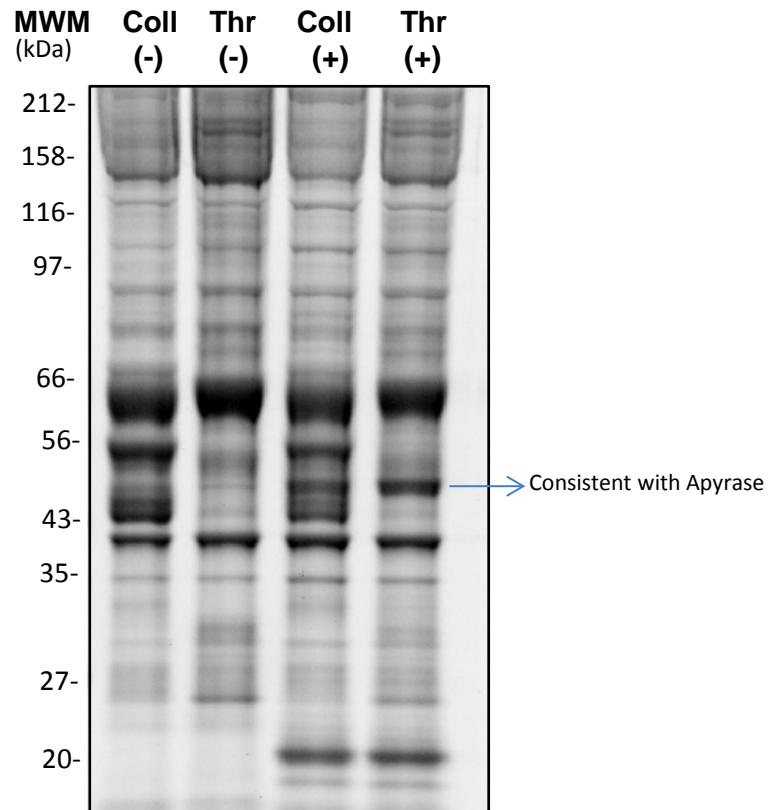

**Supplementary Figure 1.** Releasate profile comparison following platelet activation with thrombin and collagen in presence and absence of inhibitors of secondary mediators and integrilin ( $\alpha\text{IIb}\beta\text{3}$  inhibitor). Platelets were activated for 3 min with 0.75 U/mL thrombin or 30  $\mu\text{g}/\text{mL}$  collagen. When indicated, platelets were pre-incubated for 5 min with the following inhibitors: 2 U/mL apyrase, 10  $\mu\text{M}$  indomethacin, and 9  $\mu\text{M}$  integrilin. Releasates were obtained as indicated in the Methods section. Secreted proteins were separated by 1D-SDS-PAGE in 4-12% Nu-PAGE Bis-Tris gels (Invitrogen). Ten micrograms of protein were loaded per lane. The gel was stained with Sypro Ruby fluorescent dye (Lonza). MWM: molecular weight marker; Coll(-): collagen without inhibitors; Thr(-): thrombin without inhibitors; Coll(+): collagen with inhibitors; Thr(+): thrombin with inhibitors

**Supplementary Table 1.** Additional MS data.

| Spot | N† / %‡ | Mass score | Peptides identified by MS                                                                                                       |                                                                                                                                                                                            | Identified protein                                         | UniProt Code | MW (estimated)/ MW (theo) | pI (estimated)/ pI (theo) | Fold change |
|------|---------|------------|---------------------------------------------------------------------------------------------------------------------------------|--------------------------------------------------------------------------------------------------------------------------------------------------------------------------------------------|------------------------------------------------------------|--------------|---------------------------|---------------------------|-------------|
|      |         |            | m/z                                                                                                                             | Sequence                                                                                                                                                                                   |                                                            |              |                           |                           |             |
| 477  | --      | --         | --                                                                                                                              | --                                                                                                                                                                                         | Not identified                                             | --           | --                        | --                        | 4.6         |
| 481  | --      | --         | --                                                                                                                              | --                                                                                                                                                                                         | Not identified                                             | --           | --                        | --                        | 2.3         |
| 672  | 6/5     | 167.0      | 729.459<br>845.478<br>1337.725<br>1419.724<br>1465.816<br>1582.859                                                              | IQKNVK<br>TILDDLK<br>FYNQVSTPLLR<br>VQFELHYQEVK<br>KFYNQVSTPLLR<br>IQPSGGTNINEALLR                                                                                                         | Inter-alpha-trypsin inhibitor heavy chain H2 <sup>aa</sup> | ITIH2_HUMAN  | 78.953/ 106.463           | 5.89/6.40                 | 3.6         |
| 680  | 4/14    | 79.0       | 1336.634<br>1356.723<br>1859.976<br>2244.144                                                                                    | FYEEVHDLER<br>YAVLYQPLFDK<br>LDGLVETPTGYIESLPR<br>QLTVQMMQNPQILAALQER                                                                                                                      | Nucleosome assembly protein 1-like 1 <sup>aa</sup>         | NP1L1_HUMAN  | 77.161/45.374             | 4.51/4.63                 | 2.3         |
| 687  | 4/13.1  | 170.3      | 554.3190<br>407.1541<br>424.2111<br>699.6625                                                                                    | EHAVEGDCDFQLLK<br>FSVYVYAK<br>CNLLAEK<br>HTFMGVVSLGSPSGEVSHPR                                                                                                                              | Alpha-2-HS-glycoprotein                                    | FETUA_HUMAN  | 73.578/39.324             | 4.59/5.43                 | 2.1         |
| 688  | --      | --         | --                                                                                                                              | --                                                                                                                                                                                         | Not identified                                             | --           | --                        | --                        | 2.5         |
| 716  | --      | --         | --                                                                                                                              | --                                                                                                                                                                                         | Not identified                                             | --           | --                        | --                        | -2.3        |
| 775  | 10/29   | 169.0      | 1077.529<br>1130.598<br>1142.611<br>1159.627<br>1334.645<br>1415.749<br>1631.829<br>1695.842<br>2284.175<br>2312.136            | IREEYPDR<br>FPGQLNADLR<br>YLTVACIFR<br>LAVNMVPPFR<br>ISVYYNEAYGR<br>EVDQQLLSVQTR<br>AVLVDLEPGTMDSIR<br>ALSVAELTQQMFDAR<br>GLSMAATFIGNNTAIQEIFNR<br>LHFFMPGFAPLTAQGSQQYR                    | Tubulin beta-1 chain <sup>aa</sup>                         | TBB1_HUMAN   | 52.373/50.326             | 5.24/5.05                 | -4.6        |
|      | 11/32   | 101.0      | 759.448<br>1034.533<br>1117.536<br>1150.518<br>1293.753<br>1491.749<br>1513.730<br>1682.960<br>2011.958<br>2207.092<br>2536.255 | IIPFNR<br>VGPEADKYR<br>VELEDWNGR<br>TSTADYAMFK<br>QSGLYFIKPLK<br>YEASILTHDSSIR<br>YLQEIYNSNNQK<br>IHLISTQSAIPYALR<br>CHAGHLNGVYYQGGTYSK<br>EGFGHLSPTGTTEFWLGNEK<br>AIQLTYNPDESSKPNMIDAATLK | Fibrinogen gamma chain <sup>aa</sup>                       | FIBG_HUMAN   | 52.373/51.511             | 5.24/5.37                 |             |
| 776  | 14/39   | 364.0      | 944.518                                                                                                                         | GASALQLER                                                                                                                                                                                  | Tubulin beta-1 chain <sup>aa</sup>                         | TBB1_HUMAN   | 52.373/50.326             | 5.28/5.05                 | -2.5        |

|     |       |       |                                                                                                                                                                                                        |                                                                                                                                                                                                                                                                                                                                 |                                   |            |               |           |      |
|-----|-------|-------|--------------------------------------------------------------------------------------------------------------------------------------------------------------------------------------------------------|---------------------------------------------------------------------------------------------------------------------------------------------------------------------------------------------------------------------------------------------------------------------------------------------------------------------------------|-----------------------------------|------------|---------------|-----------|------|
|     |       |       | 1077.534<br>1130.600<br>1142.605<br>1159.627<br>1287.716<br>1334.645<br>1415.753<br>1631.838<br>1695.840<br>2028.032<br>2284.168<br>2312.123<br>2336.995                                               | IREEYPDR<br>FPGQLNADLR<br>YLTVACIFR<br>LAVNMVPPFR<br>KLAVNMVPPFR<br>ISVYYNEAYGR<br>EVDQQLLSVQTR<br>AVLVDLEPGTMSIR<br>ALSVAELTQQMFDAR<br>GHYTEGAELIENVLEVVR<br>GLSMAATFIGNNTAIQEIFNR<br>LHFFMPGFAPLTAQGSQQYR<br>AVLEEDEEVTEEAEMEPEDK                                                                                             |                                   |            |               |           |      |
| 778 | 17/54 | 504.0 | 808.356<br>944.518<br>1077.535<br>1130.601<br>1142.606<br>1159.628<br>1198.562<br>1334.642<br>1415.754<br>1631.836<br>1695.839<br>2028.041<br>2284.165<br>2296.151<br>2336.991<br>2707.389<br>3808.836 | EEYPDR<br>GASALQLER<br>IREEYPDR<br>FPGQLNADLR<br>YLTVACIFR<br>LAVNMVPPFR<br>VSEHFSAMFK<br>ISVYYNEAYGR<br>EVDQQLLSVQTR<br>AVLVDLEPGTMSIR<br>ALSVAELTQQMFDAR<br>GHYTEGAELIENVLEVVR<br>GLSMAATFIGNNTAIQEIFNR<br>LHFFMPGFAPLTAQGSQQYR<br>AVLEEDEEVTEEAEMEPEDK<br>LTTPTYGDLNHLVSLTMSGITSLR<br>HESECDCLQGFQIVHSLGGGTGSGMGTLMLN<br>KIR | Tubulin beta-1 chain <sup>a</sup> | TBB1_HUMAN | 52.075/50.326 | 5.20/5.05 | -2.4 |
| 800 | 5/10  | 53.0  | 960.563<br>1358.639<br>1467.835<br>1910.929<br>2045.092                                                                                                                                                | FQNALLVR<br>AVMDDFAAFVEK<br>RHPDYSVVLRLR<br>RPCFSALEVDETYVPK<br>VFDEFKPLVEEPQNLIK                                                                                                                                                                                                                                               | Serum albumin <sup>aa</sup>       | ALBU_HUMAN | 47.395/69.366 | 6.01/5.92 | -5.4 |
| 815 | 9/33  | 313.0 | 795.468<br>976.452<br>1132.531<br>1516.714<br>1639.797<br>1790.898<br>1954.056<br>1962.914<br>2359.144                                                                                                 | IIAPPER<br>AGFAGDDAPR<br>GYSFTTTAER<br>QEYDESGPSIVHR<br>LDLAGRDLTDYLMK<br>SYELPDGQVITIGNER<br>VAPEEHPVLLTEAPLNPK<br>YPIEHGIVTNWDDMEK<br>KDLYANTVLSGGTTMYPGIADR                                                                                                                                                                  | Actin cytoplasmic 2 <sup>aa</sup> | ACTG_HUMAN | 46.514/41.792 | 5.25/5.31 | -2.7 |

|      |        |       |                                                                                              |                                                                                                                                               |                                                   |             |                |           |       |
|------|--------|-------|----------------------------------------------------------------------------------------------|-----------------------------------------------------------------------------------------------------------------------------------------------|---------------------------------------------------|-------------|----------------|-----------|-------|
|      | 5/7.8  | 175.0 | 976.452<br>1516.714<br>1790.898<br>2280.143<br>2720.284                                      | AGFAGDDAPR<br>QEYDESGPSIVHR<br>SYELPDGQVITIGNER<br>MVVEVDSMPAASSVKKPFGLR<br>DLYTNTVLSGGTTMYPGMAHRMQK                                          | POTE ankyrin domain family member E <sup>aa</sup> | POTEE_HUMAN | 46.514/121.363 | 5.25/5.83 |       |
|      | 3/13.3 | 174.0 | 1189.629<br>1516.714<br>1790.898                                                             | EITALAPSIMK<br>QEYDESGPSIVHR<br>SYELPDGQVITIGNER                                                                                              | Putative beta-actin-like protein 3 <sup>aa</sup>  | ACTBM_HUMAN | 46.514/42.016  | 5.25/5.91 |       |
| 819  | 7/15   | 103.0 | 960.561<br>1149.574<br>1358.640<br>1467.836<br>1910.933<br>2045.095<br>2260.034              | FQNALLVR<br>DAHKSEVAHR<br>AVMDDFAAFVEK<br>RHPDYSVVLILLR<br>RPCFSALEVDETYVPK<br>VFDEFKPLVEEPQNLIK<br>EFNAETTFHADICTLSEK                        | Serum albumin <sup>aa</sup>                       | ALBU_HUMAN  | 46.394/69.366  | 5.77/5.92 | -11.5 |
| 855  | --     | --    | --                                                                                           | --                                                                                                                                            | Not identified                                    | --          | --             | --        | -3.9  |
| 899  | --     | --    | --                                                                                           | --                                                                                                                                            | Not identified                                    | --          | --             | --        | -2.5  |
| 956  | --     | --    | --                                                                                           | --                                                                                                                                            | Not identified                                    | --          | --             | --        | -3.7  |
| 961  | 3/7    | 164.0 | 779.403<br>1288.643<br>1873.992                                                              | ALQEYR<br>ELDESLQVAER<br>LFSDSPITVTVPVEVSR                                                                                                    | Clusterin <sup>aa</sup>                           | CLUS_HUMAN  | 40.827/52.494  | 4.70/5.88 | -3.2  |
| 962  | --     | --    | --                                                                                           | --                                                                                                                                            | Not identified                                    | --          | --             | --        | 2.6   |
| 973  | 3/6    | 140.0 | 732.402<br>1075.577<br>1393.699                                                              | SGSGLVGR<br>RPHFFFPK<br>ASSIIDELFQDR                                                                                                          | Clusterin <sup>aa</sup>                           | CLUS_HUMAN  | 40.547/52.494  | 4.75/5.88 | -4.2  |
| 1086 | --     | --    | --                                                                                           | --                                                                                                                                            | Not identified                                    | --          | --             | --        | 3.4   |
| 1103 | --     | --    | --                                                                                           | --                                                                                                                                            | Not identified                                    | --          | --             | --        | -9.0  |
| 1111 | 8/33.9 | 480.1 | 733.6163<br>584.7448<br>631.2872<br>818.3149<br>637.1970<br>680.8106<br>572.7898<br>565.2346 | VGVKPVGSDPDFQPELSGAGSR<br>IAPAFSSMSNK<br>VRIDQYQGADAVGLEEK<br>IDQYQGADAVGLEEK<br>QHLENDPGSNEDTDIPK<br>GYMDLMPFINK<br>FQGPDNGQGPK<br>SMDFEEAER | Thioredoxin-like protein 1                        | TXNL1_HUMAN | 35.301/32.251  | 4.99/4.84 | -4.7  |
|      | 2/7.3  | 92.2  | 536.3023<br>771.9748                                                                         | EIQNAVNGVK<br>VTTVASHTSDSDVPSGVTEVVVK                                                                                                         | Clusterin                                         | CLUS_HUMAN  | 35.301/52.494  | 4.99/5.88 |       |
| 1199 | 1/4.0  | 65.0  | 559.6930                                                                                     | SGTDVDAANLR                                                                                                                                   | Caspase-3                                         | CASP3_HUMAN | 31.937/31.607  | 6.43/6.09 | -2.2  |
| 1203 | 7/7    | 291.0 | 1299.698<br>1330.694<br>1376.711<br>1417.748<br>1759.839<br>2083.019<br>2129.066             | EDTSPAVLGLAAR<br>LANPLHFYEAR<br>IETSSLDGENRR<br>ESYNVQLQLPAR<br>SEGPYFSLTSTEQSVK<br>SHLYGITAVYPYCPTGRK<br>FSNLYVGTNGIISTQDFPR                 | Nidogen-2 <sup>aa</sup>                           | NID2_HUMAN  | 31.657/151.253 | 4.88/5.09 | 2.5   |

|      |        |       |                                                                                             |                                                                                                                                    |                                                                  |             |                |           |      |
|------|--------|-------|---------------------------------------------------------------------------------------------|------------------------------------------------------------------------------------------------------------------------------------|------------------------------------------------------------------|-------------|----------------|-----------|------|
| 1226 | 8/8    | 355.0 | 989.616<br>1030.505<br>1062.566<br>1207.637<br>1394.738<br>1616.819<br>1864.908<br>2195.072 | GFLLLASLR<br>GPDPSAPFR<br>FQDLVDAVR<br>SITLHVQEDR<br>FVFGTTPEDILR<br>GGVNDNFQGVLQNVNR<br>MENAELDVPIQSVFTR<br>IPESGGDNSVDFIFELTGAAR | Thrombospondin-1 <sup>aa</sup>                                   | TSP1_HUMAN  | 30.736/129.382 | 5.60/4.71 | -2.0 |
| 1244 | 5/14.8 | 284.9 | 846.0040<br>497.8626<br>757.2810<br>647.3497<br>440.6205                                    | AIQLTYNPDESSKPNMIDAATLK<br>YEASILTHDSSIR<br>YLQEIYNSNNQK<br>QSGLYFIKPLK<br>LDGSVDFK                                                | Fibrinogen gamma chain                                           | FIBG_HUMAN  | 29.694/51.511  | 5.57/5.37 | -4.3 |
|      | 1/1.1  | 74.0  | 716.8663                                                                                    | LVEENALAPDFSK                                                                                                                      | Multimerin-1                                                     | MMRN1_HUMAN | 29.694/138.110 | 5.57/8.15 |      |
| 1263 | --     | --    | --                                                                                          | --                                                                                                                                 | Not identified                                                   | --          | --             | --        | 2.7  |
| 1269 | --     | --    | --                                                                                          | --                                                                                                                                 | Not identified                                                   | --          | --             | --        | 2.1  |
| 1271 | --     | --    | --                                                                                          | --                                                                                                                                 | Not identified                                                   | --          | --             | --        | 5.2  |
| 1274 | 2/10.1 | 123.9 | 617.2464<br>497.2080                                                                        | GFQALGDAADIR<br>SEEFLLIAGK                                                                                                         | Metalloproteinase inhibitor 1                                    | TIMP1_HUMAN | 28.373/23.170  | 6.01/8.46 | 2.4  |
|      | 1/6.6  | 75.2  | 851.8697                                                                                    | DDVGGAQDVGMLGILVK                                                                                                                  | Haloacid dehalogenase-like hydrolase domain-containing protein 2 | HDHD2_HUMAN | 28.373/28.535  | 6.01/5.84 |      |
| 1275 | 7/13   | 57.0  | 927.495<br>960.563<br>1149.610<br>1467.839<br>1742.849<br>1910.921<br>2045.053              | YLYEIAR<br>FQNALLVR<br>LVNEVTEFAK<br>RHPDYSVLLLLR<br>HPYFYAPPELLFFAK<br>RPCFSALEVDETYVPK<br>VFDEFKPLVEEPQNLK                       | Serum albumin <sup>aa</sup>                                      | ALBU_HUMAN  | 28.333/69.366  | 5.71/5.92 | 3.2  |
| 1278 | --     | --    | --                                                                                          | --                                                                                                                                 | Not identified                                                   | --          | --             | --        | 2.4  |
| 1292 | --     | --    | --                                                                                          | --                                                                                                                                 | Not identified                                                   | --          | --             | --        | 3.0  |
| 1301 | 2/32.1 | 111.2 | 712.5689<br>752.3000                                                                        | VDNALQSGNSQESVTEQDSK<br>DSTYSLSSTLTLSK                                                                                             | Ig kappa chain C region                                          | IGKC_HUMAN  | 27.532/11.608  | 5.42/5.58 | 2.1  |
|      | 1/17.9 | 57.3  | 993.4045                                                                                    | AAPSVTLFPPSSEELQANK                                                                                                                | Ig lambda-2 chain C regions                                      | LAC2_HUMAN  | 27.532/11.293  | 5.42/6.91 |      |
| 1309 | 2/7.5  | 76.5  | 845.9940<br>647.3155                                                                        | AIQLTYNPDESSKPNMIDAATLK<br>QSGLYFIKPLK                                                                                             | Fibrinogen gamma chain                                           | FIBG_HUMAN  | 27.051/51.511  | 5.98/5.37 | -3.5 |
|      | 1/1.1  | 81.3  | 716.7845                                                                                    | LVEENALAPDFSK                                                                                                                      | Multimerin-1                                                     | MMRN1_HUMAN | 27.051/138.110 | 5.98/8.15 |      |
|      | 1/3.6  | 40.7  | 428.6747                                                                                    | LGAETLPR                                                                                                                           | Cardiotrophin-like cytokine factor 1                             | CLCF1_HUMAN | 27.051/24.086  | 5.98/8.91 |      |
| 1348 | 6/27.9 | 398.8 | 601.7407<br>959.3426<br>485.5411<br>809.2749<br>631.1764<br>876.3069                        | SIQEIQLDK<br>SIQEIQLDKDDESLR<br>QSFVLKEGVEYR<br>IDKTDYMGVSYGPR<br>TDYMGVSYGPR<br>AEEYEFLTPVEEAPK                                   | Rho GDP-dissociation inhibitor 1                                 | GDIR1_HUMAN | 25.009/23.207  | 5.03/5.01 | 8.9  |

|      |        |       |                                                                                                          |                                                                                                                                             |                                        |             |               |           |      |
|------|--------|-------|----------------------------------------------------------------------------------------------------------|---------------------------------------------------------------------------------------------------------------------------------------------|----------------------------------------|-------------|---------------|-----------|------|
| 1373 | 5/25.9 | 397.8 | 970.2622<br>854.8027<br>656.2696<br>716.6494<br>428.2652                                                 | APEPHVEEDDDDELDSK<br>ELQEMDKDDESLIK<br>TLLGDGPVVTPDK<br>TLLGDGPVVTPDKAPNVVVTR<br>APNVVVTR                                                   | Rho GDP-dissociation inhibitor 2       | GDIR2_HUMAN | 24.591/22.988 | 5.23/5.08 | 3.1  |
| 1378 | 2/13.0 | 199.6 | 542.3423<br>558.2401<br>555.7220                                                                         | TTTGSYIANR<br>LAAIAESGVER<br>QVLLGDQIPK                                                                                                     | Proteasome subunit beta type-6         | PSB6_HUMAN  | 24.519/25.357 | 4.94/4.80 | 8.3  |
| 1393 | 3/14.3 | 145.1 | 517.7174<br>436.2565<br>615.7708                                                                         | IPPTFENGR<br>VLNQELR<br>NILTSNNIDVK                                                                                                         | Apolipoprotein D                       | APOD_HUMAN  | 24.290/21.275 | 5.05/5.06 | 3.6  |
|      | 1/5.1  | 60.2  | 771.9686                                                                                                 | VTTVASHTSDSDVPSGVTEVVVK                                                                                                                     | Clusterin                              | CLUS_HUMAN  | 24.290/52.494 | 5.05/5.88 |      |
| 1397 | 4/15.7 | 296.7 | 908.2943<br>700.7830<br>806.8016<br>608.2316                                                             | DSGRDYVSQFEGSALGK<br>DYVSQFEGSALGK<br>LLDNWDSVTSTFSK<br>ATEHLSTLSEK                                                                         | Apolipoprotein A-I                     | APOA1_HUMAN | 24.218/30.777 | 5.42/5.56 | -3.9 |
|      | 1/5.2  | 47.3  | 669.3233                                                                                                 | PPYTVVYFPVR                                                                                                                                 | Glutathione S-transferase P            | GSTP1_HUMAN | 24.218/23.355 | 5.42/5.43 |      |
| 1413 | 9/31.8 | 555.2 | 908.3457<br>700.7926<br>806.8114<br>626.7458<br>734.3038<br>437.1680<br>524.1869<br>651.2347<br>608.2018 | DSGRDYVSQFEGSALGK<br>DYVSQFEGSALGK<br>LLDNWDSVTSTFSK<br>VQPYLDDFQK<br>VEPLRAELQEGAR<br>AELQEGAR<br>LSPLGEEMR<br>THLAPYSDELRL<br>ATEHLSTLSEK | Apolipoprotein A-I                     | APOA1_HUMAN | 23.976/30.777 | 5.30/5.56 | 3.8  |
| 1416 | --     | --    | --                                                                                                       | --                                                                                                                                          | Not identified                         | --          | --            | --        | 5.9  |
| 1438 | 2/10   | 58.0  | 1169.673<br>1313.588                                                                                     | FLVGPDPGVPLR<br>DYTQMNELQR                                                                                                                  | Glutathione peroxidase 1 <sup>aa</sup> | GPX1_HUMAN  | 23.627/22.088 | 5.72/6.15 | 3.4  |
| 1461 | --     | --    | --                                                                                                       | --                                                                                                                                          | Not identified                         | --          | --            | --        | 3.2  |
| 1508 | 7/49   | 75.0  | 820.430<br>1218.627<br>1231.686<br>1279.603<br>1415.605<br>1694.818<br>3346.679                          | GPAYGLSR<br>NVIGLQMG TNR<br>TLMNLGGLAVAR<br>NFS DNQLQEGK<br>GASQAGMTGYGMPR<br>QMEQISQFLQAAER<br>ENFQNW LKDGTVLCELINALYPEGQAPVK              | Transgelin-2 <sup>aa</sup>             | TAGL2_HUMAN | 22.288/22.391 | 5.63/8.41 | 2.6  |
| 1516 | 6/32.5 | 330.4 | 657.1674<br>530.2144<br>669.0071<br>929.8311<br>585.3046<br>442.5360                                     | DYTQMNELQR<br>NEEILNSLK<br>YVRPGGGFEPNFMLFEK<br>EALPAPSDDATALMTPDK<br>FLVGPDPGVPLR<br>FLVGPDPGVPLRR                                         | Glutathione peroxidase 1               | GPX1_HUMAN  | 22.192/22.088 | 5.73/6.15 | 2.9  |
| 1530 | --     | --    | --                                                                                                       | --                                                                                                                                          | Not identified                         | --          | --            | --        | 3.3  |
| 1540 | --     | --    | --                                                                                                       | --                                                                                                                                          | Not identified                         | --          | --            | --        | -3.9 |



|      |        |       |                                                                                                                                                                  |                                                                                                                                                                                                                                 |                                                                    |             |                 |           |      |
|------|--------|-------|------------------------------------------------------------------------------------------------------------------------------------------------------------------|---------------------------------------------------------------------------------------------------------------------------------------------------------------------------------------------------------------------------------|--------------------------------------------------------------------|-------------|-----------------|-----------|------|
| 1553 | --     | --    | --                                                                                                                                                               | --                                                                                                                                                                                                                              | Not identified                                                     | --          | --              | --        | 6.0  |
| 1558 | --     | --    | --                                                                                                                                                               | --                                                                                                                                                                                                                              | Not identified                                                     | --          | --              | --        | 10.2 |
| 1559 | 2/1    | 114.0 | 1894.914<br>2293.081                                                                                                                                             | AADIEQQAVFAVFDENK<br>LELQGCVEVNGCSTPLGMENK                                                                                                                                                                                      | Coagulation factor V <sup>aa</sup>                                 | FA5_HUMAN   | 21.348/251.703  | 4.69/5.68 | 10.9 |
| 1560 | 4/28   | 238.0 | 1246.587<br>1253.558<br>1449.585<br>2106.977                                                                                                                     | GNFNYVEFTR<br>EAFNMIDQNR<br>FTDEEVDEMYR<br>ATSNVFAMFDQSQIQEFK                                                                                                                                                                   | Myosin regulatory light polypeptide 9 <sup>aa</sup>                | MYL9_HUMAN  | 21.336/19.827   | 4.72/4.78 | 8.5  |
| 1585 | 1/6.0  | 59.8  | 493.2444                                                                                                                                                         | LVVLGSGGGVVK.                                                                                                                                                                                                                   | Ras-related protein Rap-1A                                         | RAP1A_HUMAN | 20.853/20.987   | 4.94/6.93 | 3.0  |
| 1595 | --     | --    | --                                                                                                                                                               | --                                                                                                                                                                                                                              | Not identified                                                     | --          | --              | --        | 4.8  |
| 1647 | --     | --    | --                                                                                                                                                               | --                                                                                                                                                                                                                              | Not identified                                                     | --          | --              | --        | 4.2  |
| 1650 | --     | --    | --                                                                                                                                                               | --                                                                                                                                                                                                                              | Not identified                                                     | --          | --              | --        | 9.1  |
| 1654 | --     | --    | --                                                                                                                                                               | --                                                                                                                                                                                                                              | Not identified                                                     | --          | --              | --        | 6.2  |
| 1657 | --     | --    | --                                                                                                                                                               | --                                                                                                                                                                                                                              | Not identified                                                     | --          | --              | --        | 7.4  |
| 1658 | --     | --    | --                                                                                                                                                               | --                                                                                                                                                                                                                              | Not identified                                                     | --          | --              | --        | 12.9 |
| 1663 | --     | --    | --                                                                                                                                                               | --                                                                                                                                                                                                                              | Not identified                                                     | --          | --              | --        | 3.4  |
| 1669 | --     | --    | --                                                                                                                                                               | --                                                                                                                                                                                                                              | Not identified                                                     | --          | --              | --        | 4.7  |
| 1672 | 1/4.0  | 85.2  | 801.7602                                                                                                                                                         | ADFSGMSQTDLSLSK                                                                                                                                                                                                                 | Serpin B6 <sup>aa</sup>                                            | SPB6_HUMAN  | 19.093/42.621   | 4.48/5.0  | 4.3  |
| 1673 | --     | --    | --                                                                                                                                                               | --                                                                                                                                                                                                                              | Not identified                                                     | --          | --              | --        | 16.6 |
| 1674 | --     | --    | --                                                                                                                                                               | --                                                                                                                                                                                                                              | Not identified                                                     | --          | --              | --        | 18.1 |
| 1684 | --     | --    | --                                                                                                                                                               | --                                                                                                                                                                                                                              | Not identified                                                     | --          | --              | --        | 17.7 |
| 1727 | --     | --    | --                                                                                                                                                               | --                                                                                                                                                                                                                              | Not identified                                                     | --          | --              | --        | -4.1 |
| 1730 | 1/10.8 | 56.4  | 528.7684                                                                                                                                                         | VYSTSVTGSR                                                                                                                                                                                                                      | SH3 domain-binding glutamic acid-rich-like protein 3 <sup>aa</sup> | SH3L3_HUMAN | 17.374/10.437   | 4.55/4.7  | 4.3  |
| 1738 | --     | --    | --                                                                                                                                                               | --                                                                                                                                                                                                                              | Not identified                                                     | --          | --              | --        | 5.6  |
| 1739 | --     | --    | --                                                                                                                                                               | --                                                                                                                                                                                                                              | Not identified                                                     | --          | --              | --        | 4.1  |
| 1753 | --     | --    | --                                                                                                                                                               | --                                                                                                                                                                                                                              | Not identified                                                     | --          | --              | --        | 2.2  |
| 1800 | --     | --    | --                                                                                                                                                               | --                                                                                                                                                                                                                              | Not identified                                                     | --          | --              | --        | -2.8 |
| 1818 | 14/6   | 221.0 | 705.392<br>767.403<br>845.482<br>977.511<br>1015.597<br>1097.493<br>1169.600<br>1312.656<br>1406.679<br>1520.772<br>1700.733<br>1738.872<br>2408.111<br>2864.336 | LECRK<br>STSVFAR<br>TNTGLALR<br>YPPGTSLSR<br>AVSPLPYLR<br>AFVVDMMER<br>LSGEAYGFVAR<br>SFSIIGDFQNGK<br>GLYLETEAGYYK<br>IDGSGNFQVLLSDR<br>LSYGEDLQMDWDGR<br>YFTFSGICQYLLAR<br>CLPSACEVVTGSPRGDSQSSWK<br>VPLDSSPATCHNNIMKQTMVDSSCR | von Willebrand factor <sup>aa</sup>                                | VWF_HUMAN   | 148.539/309.264 | 4.52/5.29 | 2.1  |
|      | 4/4    | 103.0 | 845.482<br>1337.724                                                                                                                                              | TILDDLRL<br>FYNQVSTPLLR                                                                                                                                                                                                         | Inter-alpha-trypsin inhibitor heavy chain H2 <sup>aa</sup>         | ITIH2_HUMAN | 148.539/106.463 | 4.52/6.40 |      |

|      |        |       |                                                                                                                                                                             |                                                                                                                                                                                                                               |                                                            |             |                 |           |      |
|------|--------|-------|-----------------------------------------------------------------------------------------------------------------------------------------------------------------------------|-------------------------------------------------------------------------------------------------------------------------------------------------------------------------------------------------------------------------------|------------------------------------------------------------|-------------|-----------------|-----------|------|
|      |        |       | 1419.719<br>1582.854                                                                                                                                                        | VQFELHYQEVK<br>IQPSGGTNINEALLR                                                                                                                                                                                                |                                                            |             |                 |           |      |
| 1825 | --     | --    | --                                                                                                                                                                          | --                                                                                                                                                                                                                            | Not identified                                             | --          | --              | --        | -8.6 |
| 1838 | --     | --    | --                                                                                                                                                                          | --                                                                                                                                                                                                                            | Not identified                                             | --          | --              | --        | 5.4  |
| 1839 | 3/4    | 63.0  | 956.500<br>1018.466<br>1749.945                                                                                                                                             | VYFAGFPR<br>FSAEFDPR<br>SQDILLSVENTVIYR                                                                                                                                                                                       | Vitamin K-dependent protein S <sup>aa</sup>                | PROS_HUMAN  | 128.828/75.122  | 4.80/5.48 | 2.0  |
| 1842 | 5/5    | 141.0 | 792.433<br>845.478<br>1419.723<br>1465.799<br>1582.859                                                                                                                      | ALYAQAR<br>TILDDL<br>VQFELHYQEVK<br>KFYNQVSTPLLR<br>IQPSGGTNINEALLR                                                                                                                                                           | Inter-alpha-trypsin inhibitor heavy chain H2 <sup>aa</sup> | ITIH2_HUMAN | 155.109/106.463 | 4.61/6.40 | 4.5  |
| 1843 | 15/21  | 163.0 | 824.423<br>829.431<br>904.463<br>963.460<br>987.501<br>1099.587<br>1144.543<br>1228.617<br>1266.672<br>1374.651<br>1462.596<br>1755.846<br>1914.860<br>1996.901<br>2022.151 | HFEHVR<br>FLHQER<br>HVFNMLK<br>VEAMLNDR<br>SQVMTHLR<br>AVIQHFQEK<br>WYFDVTEGK<br>QQLVETHMAR<br>THPHFVIPYR<br>VESLEQEAANER<br>CAPFFYGGCGGGR<br>ISYGNDALMPSLTETK<br>YLETSGDENEHAHFQK<br>EQNYSDDVLANMISEPR<br>LALENYITALQAVPPRPR | Amyloid beta A4 protein <sup>aa</sup>                      | A4_HUMAN    | 149.136/83.943  | 4.49/4.73 | 2.4  |
|      | 5/5    | 144.0 | 732.398<br>845.481<br>1337.721<br>1419.725<br>1582.852                                                                                                                      | TQVADAK<br>TILDDL<br>FYNQVSTPLLR<br>VQFELHYQEVK<br>IQPSGGTNINEALLR                                                                                                                                                            | Inter-alpha-trypsin inhibitor heavy chain H2 <sup>aa</sup> | ITIH2_HUMAN | 149.136/106.463 | 4.49/6.40 |      |
| 1860 | 5/15.0 | 296.1 | 845.9940<br>497.8477<br>757.2816<br>647.3559<br>559.2233                                                                                                                    | AIQLTYNPDESSKPNMIDAATLK<br>YEASILTHDSSIR<br>YLQEIYNSNNQK<br>QSGLYFIKPLK<br>VELEDWNGR                                                                                                                                          | Fibrinogen gamma chain                                     | FIBG_HUMAN  | 47.275/51.511   | 5.78/5.37 | -3.7 |
|      | 4/10.8 | 222.3 | 882.4243<br>514.7682<br>912.8290<br>485.6713                                                                                                                                | QIEINTISASFGLASR<br>AIENELLAR<br>EGGGNNLYGEEVMQALK<br>ASYILMEK                                                                                                                                                                | Glutathione synthetase                                     | GSHB_HUMAN  | 47.275/52.384   | 5.78/5.67 |      |
| 1866 | 2/24.5 | 124.2 | 683.8579<br>817.9774                                                                                                                                                        | GSPAINVAVHVFR<br>ALGISPFHEHAEVVFTANDSGPR                                                                                                                                                                                      | Transthyretin <sup>aa</sup>                                | TTHY_HUMAN  | 18.960/15.887   | 4.94/5.49 | 2.6  |
| 1867 | --     | --    | --                                                                                                                                                                          | --                                                                                                                                                                                                                            | Not identified                                             | --          | --              | --        | 2.9  |
| 1869 | 6/5    | 152.0 | 732.395                                                                                                                                                                     | TQVADAK                                                                                                                                                                                                                       | Inter-alpha-trypsin inhibitor heavy chain H2 <sup>aa</sup> | ITIH2_HUMAN | 77.460/106.463  | 5.99/6.40 | 4.7  |

|      |        |       |                                                         |                                                                         |                                  |             |               |           |      |
|------|--------|-------|---------------------------------------------------------|-------------------------------------------------------------------------|----------------------------------|-------------|---------------|-----------|------|
|      |        |       | 845.480<br>1337.718<br>1419.719<br>1465.803<br>1582.852 | TILDDL<br>FYNQVSTPLLR<br>VQFELHYQEVK<br>KFYNQVSTPLLR<br>IQPSGGTNINEALLR |                                  |             |               |           |      |
| 1874 | 3/20.6 | 176.7 | 639.9150<br>631.1940<br>876.3501                        | SIQEIQELDKDDESLR<br>TDYMGVSYGPR<br>AEEYEFLTPVEEAPK                      | Rho GDP-dissociation inhibitor 1 | GDIR1_HUMAN | 25.370/23.207 | 4.92/5.01 | 6.7  |
| 1875 | --     | --    | --                                                      | --                                                                      | Not identified                   | --          | --            | --        | -6.3 |
| 1876 | --     | --    | --                                                      | --                                                                      | Not identified                   | --          | --            | --        | -3.1 |

Identifications were by ESI-TRAP unless stated otherwise. Proteins identified by <sup>a</sup>MALDI-MS or <sup>aa</sup>MALDI-MS/MS. †  
Number of matched peptides. ‡ % coverage of full length protein by tryptic peptides. All differential proteins have a p value  
lower than 0.05. A positive fold change indicates that the protein feature is up-regulated in the releasate of thrombin-  
stimulated platelets, whereas a negative fold change indicates that the protein feature is up-regulated in the platelet-collagen  
releasate.

## Supplementary Methods

### MS analysis

For MALDI analysis, dried peptides were dissolved in 4  $\mu\text{L}$  of 0.5% formic acid. Equal volumes (0.5  $\mu\text{L}$ ) of peptide and matrix solution (3 mg  $\alpha$ -cyano-4-hydroxycinnamic acid ( $\alpha$ -CHCA) dissolved in 1 mL of 50% acetonitrile in 0.1% trifluoroacetic acid) were deposited using the thin layer method, onto a 384 Opti-TOF 123x81 mm MALDI plate (Applied Biosystems) and allowed to dry at room temperature. Mass spectrometric data were obtained in an automated analysis loop using a 4800 MALDI-TOF/ TOF analyzer (Applied Biosystems). Spectra were acquired in the reflector positive-ion mode with a Nd:YAG, 355nm wavelength laser, at 200 Hz laser frequency, and 1000 to 2000 individual spectra were averaged. The experiments were acquired uniform with fixed laser intensity. For MS/MS 1kV analysis mode, precursors were accelerated to 8 kV in source 1, selected with a relative resolution of 200 (FWHM) and metastable suppression. Fragment ions generated by collision with air in a CID chamber were further accelerated by 15 kV in source 2. Automated analysis of mass data was performed using the 4000 Series Explorer Software version 3.5.3 (Applied Biosystems). Internal calibration of MALDI-TOF mass spectra was performed using two trypsin autolysis ions with  $m/z = 842.510$  and  $m/z = 2211.105$ . For MALDI-MS/MS, calibrations were performed with fragment ion spectra obtained for Glub-fibrinopeptide (4700 Cal Mix, Applied Biosystems). MALDI-MS and MS/MS data were combined through the GPS Explorer Software Version 3.6 to search a non-redundant protein database (Swissprot 2012\_10) using the Mascot software version 2.2 (Matrix Science), with 50 ppm precursor tolerance, 0.6 Da MS/MS fragment tolerance, CAM (carbamidomethyl cystein) as fixed modification, oxidized methionine as variable modification and allowing 1 missed cleavage. MALDI-MS(/MS) spectra and database search results were manually inspected in detail using the previous software. For combined MS and MS/MS data, identifications were accepted

when Confidence Interval (C.I.%) of GPS software was 95% or higher. Since Protein Scores and Ion Scores from different searches cannot be directly compared, GPS software calculates this C.I.% in order to combine results from MS and MS/MS database searches. This coefficient value means that the probability that the observed match is a random event is lower than 5%. For PMF spectra, identifications were also accepted when (C.I.%) of GPS software was 99% or higher.

For LC-MS/MS digested peptide mixtures dissolved in 0.1% formic acid were separated in an EASY-nLC (Proxeon, Bruker Daltonik GmbH) with a reverse phase nanocolumn (Easy column SC200 C18 3 $\mu$ m 120A 360  $\mu$ m OD/75 $\mu$ m ID, L=10cm) from Proxeon. Ionized peptides were analyzed in a Bruker Amazon ETD ion trap. Automated analysis of mass data was achieved by Data Analysis 4.0 and BioTools 3.2 from Bruker Daltonik GmbH. Database search was performed with the Mascot v2.4 search tool (Matrix Science, London, UK) screening SwissProt (release\_56.1). Searches were restricted to human taxonomy allowing carbamidomethyl cysteine as a fixed modification and oxidized methionine as potential variable modification. Both the precursor mass tolerance and the MS/MS tolerance were set at 0.3 and 0.4 Da, respectively, allowing 1 missed tryptic cleavage site. All spectra and database results were manually inspected in detail using the above software, especially in the case of identifications based on one peptide hit. For the latter, positive identification by MS was only accepted when more than 50% y-ions were obtained for a peptide comprising at least eight amino acids long and no missed tryptic cleavage site. Positive hits corresponded to Mascot scores > 40 plus the fulfillment of the above criteria.
